# Supplementary material
Source: HighWire-hosted journal article supplement (https://rc.rcjournal.com/highwire/filestream/24404/field_highwire_adjunct_files/0/rc-10354-File002.docx)
Supplement: rc-10354-File002.docx [file rc-10354-File002.docx]

**Supplemental Digital Content**


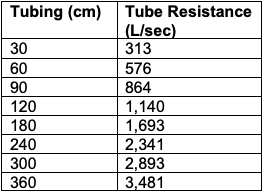


**Table E1.** Leak tubing and resistance, measured with 0.5 liter of flow


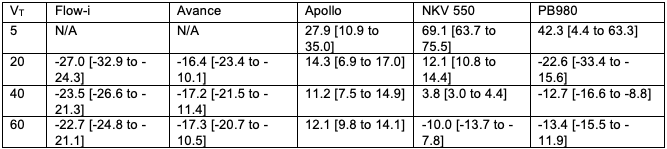


**Table E2.** Median and interquartile range of VT % error per ventilator at different set VT


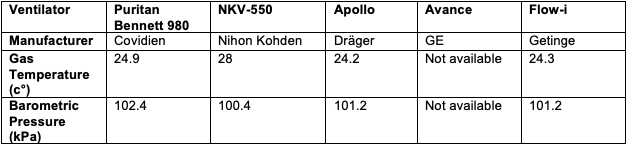


**Table E3.** Ventilator Characteristics
